# Supplementary material for: Application of the pore water stable isotope method and hydrogeological approaches to characterise a wetland system
Source: Copernicus journal article supplement (doi:10.5194/hess-22-6023-2018), 2018-11-26
Supplement: Supplementary file 1 [file hess-22-6023-2018-supplement.zip]

Archive with 3 entries (3 files):
- Supplementary info V2.xlsx
- hess-22-6023-2018-supplement-title-page.pdf
- Supplement.docx
