# Supplementary material for: Application of the pore water stable isotope method and hydrogeological approaches to characterise a wetland system
Source: Copernicus journal article supplement (doi:10.5194/hess-22-6023-2018), 2018-11-26
Supplement: Supplementary file 1 [file hess-22-6023-2018-supplement.zip › hess-22-6023-2018-supplement-title-page.pdf]

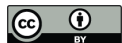

## *Supplement of*

# **Application of the pore water stable isotope method and hydrogeological approaches to characterise a wetland system**

**Katarina David et al.**

*Correspondence to:* Katarina David ([k.david@unsw.edu.au](mailto:k.david@unsw.edu.au))

- [hess-22-6023-2018-supplement-title-page.pdf](#)
- [Supplement.docx](#)
- [Supplementary info V2.xlsx](#)

The copyright of individual parts of the supplement might differ from the CC BY 4.0 License.
