# Supplementary material for: Application of the pore water stable isotope method and hydrogeological approaches to characterise a wetland system
Source: Copernicus journal article supplement (doi:10.5194/hess-22-6023-2018), 2018-11-26
Supplement: Supplementary file 1 [file hess-22-6023-2018-supplement.zip › Supplementary info V2.xlsx]

## Sheet: Table 2
Sample id	Easting (m)	Northning (m)	Piezo depth	Depth to water	Sample type	Collected	Comment
CCG1	241176	6302698	1.49	0.09	piezometer	2016-10-01
CCG1	241176	6302698	1.49	0.47	piezometer	2016-05-01
CCG2	241179	6302696			repeated augering	2016-10-01
CCG2	241179	6302696			augered	2016-05-01	In May 17 augered pH and EC measured sample taken
CCG3	241166	6303197			augered	2016-05-01	no water sample in May16
CCG3	241166	6303197		0.2	reaugered	2016-10-01
CCS4	241042	6303452			Surface water	2016-10-01
CCWS1	239836	6303817			Surface water	2016-10-01
GGCS1	240488	6303289			Surface water	2016-10-01
GGEG1	240479	6303181			augered hole	2016-05-01	no water samples
GGEG2	240209	6302352		0.35	piezo	2016-05-01
GGEG2A	240210	6302355			augered hole	2016-05-01	no water samples
GGEG3	240037	6301728			augered hole	2016-05-01	no sample taken
GGEG4	239939	6301850		0.4	augered hole	2016-05-01
GGEG4	239939	6301850		0.7	re-augered hole	2016-10-01	water dirty , measure EC and pH measurement in hole , water sample in CF
GGEG5	240494	6303178	10.78	4.5	piezometer	2016-10-01
GGEG5x	239942	6301853		0.28	piezometer	2016-10-01
GGES1	240480	6303208			Surface water	2016-05-01
GGES2	240040	6301730			Surface water	2016-10-01
GGES2					Surface water	2016-05-01
GGSW1	240431	6303206			Surface water	2016-10-01
GGSWG1	240266	6303095		0.13	Piezometer	2016-10-01
GGSWG2	239977	6302927		1.1	piezometer	2016-10-01
GGSWG4	240261	6303012		0.05	augered hole	2016-10-01

## Sheet: Table 3 MC may16
Moisture content May2016
Sample id	Sample depth	BEFORE drying with foil (g)	after drying with foil (g)	foil (g)	MC (%)
CCG2 10	10	15.003	4.55	0.799	278.672
CCG2 50	50	12.444	9.117	0.786	39.9352
CCG2 80	80	14.038	12.207	1.002	16.3409
CCG2 90	90	25.152	21.023	0.417	20.0379
CCG2 110	110	13.132	11.559	0.986	14.8775
CCG3 20	20	10.746	5.655	0.435	97.5287
CCG3 30	30	16.794	7.656	0.903	135.318
CCG3 40	40	9.694	6.237	0.818	63.7941
CCG3 50	50	12.899	8.707	0.782	52.8959
CCG3 80	80	13.922	11.783	0.793	19.4631
CCG3 100	100	16.862	15.233	1.085	11.514
GGEG1_1 0-10	10	11.741	4.753	0.678	171.485
GGEG1_2 10-20	20	8.698	6.034	0.964	52.5444
GGEG1_3 20-35	35	16.062	12.067	1.059	36.2918
GGEG1_4 40-50	50	19.773	16.294	0.88	22.5704
GGEG1_5 50-60	60	29.116	23.786	0.862	23.2507
GGEG2_1 10	10	9.635	3.189	0.873	278.325
GGEG2_2 30	30	25.531	10.342	0.624	156.298
GGEG2_3 40	40	30.759	18.103	0.972	73.8778
GGEG2 60	60	38.578	30.621	0.864	26.7399
GGEG2 70	70	15.828	13.025	1.003	23.3156
GGEG2 80	80	14.777	11.702	0.738	28.0463
GGEG2 100	100	16.033	13.23	0.64	22.2637
GGEG2 110	110	11.822	9.849	0.919	22.0941
GGEG2 140	140	28.757	24.259	0.644	19.0472
GGEG3 30	30	16.207	6.306	1.095	190.002
GGEG3 60	60	17.302	8.838	0.725	104.326
GGEG3 70	70	17.391	9.509	0.881	91.3537
GGEG3 90	90	14.329	11.657	0.536	24.0266
GGEG3 110	110	14.762	12.356	0.835	20.8836
GGEG4 10	10	13.403	5.449	1.042	180.486
GGEG4 30	30	19.803	10.257	0.793	100.866
GGEG4 60	60	21.504	15.422	0.751	41.4559
GGEG4 70	70	14.354	10.034	0.927	47.436
GGEG4 90	90	6.91	5.139	0.659	39.5312
GGEG4 110	110	11.039	9.9987	0.666	11.1468

## Sheet: Table 4 MC Oct16
Moisture content October 2016
Sample id	Sample depth (cm)	BEFORE drying with foil (g)	after drying with foil (g)	foil (g)	MC (%)
CCG2 0-30	30	13.287	5.764	1.669	183.712
CCG2 30-50	50	16.083	10.911	1.054	52.4703
CCG2 50-60	60	32.85	20.815	1.424	62.0649
CCG2 60-80	80	21.143	17.797	1.6	20.6581
CCG3 0-45	45	17.629	6.208	1.51	243.103
CCG3 45-80	80	22.119	12.188	1.357	91.6905
CCG3 80-100	100	23.007	17.241	1.539	36.7214
CCG3 80-115	115	34.938	25.648	1.086	37.8227
CCG3 115-123	123	19.908	16.869	1.403	19.6496
GGEG4 0-30	30	18.845	8.219	1.9	168.16
GGEG4 30-40	40	35.174	20.516	1.182	75.8146
GGEG4 40-50	50	21.891	15.344	1.511	47.3289
GGEG4 50-60	60	35.171	25.354	1.571	41.2774
GGEG4 60-80	80	59.613	47.06	1.58	27.6011
GGEG4 80-95	95	17.204	17.711	1.38	3.10453
GGSWG4 0-25	25	11.32	4.633	1.377	205.375
GGSWG4 25-35	35	17.462	13.427	1.509	33.8564
GGSWG4 35-50	50	29.648	22.573	1.684	33.8695
GGSWG4 50-65	65	21.566	17.492	1.407	25.3279
GGSWG4 65-75	75	23.93	20.368	1.71	19.091

## Sheet: Table 5 Water samples
Water samples
Sample Name	Processed Delta 2H (‰)	Processed Delta 18O(‰)	Description	Date
sample	D2H	O18
GGES1	-35.6324	-7.46162	Surface water	2016-05-01
GGES2	-33.0277	-8.24836	Surface water	2016-05-01
GGEG2	-29.9081	-8.07488	GW- piezometer	2016-05-01
CCG1	-28.7274	-7.85168	GW- piezometer	2016-05-01
GGEG4	-33.9224	-9.09476	GW- augered hole	2016-05-01
CCG2	-27.3789	-9.43841	GW- augered hole	2016-05-01
GGEG5 deep	-38.4137	-7.15667	gw	Oct dataset
GGSWG4	-32.8552	-6.3254	gw	Oct dataset
CCG3	-35.9395	-6.58403	gw	Oct dataset
GGEG5	-40.3582	-7.1463	gw	Oct dataset
CCS4	-37.7148	-6.8294	gw	Oct dataset
GGSWG1	-38.6993	-7.26904	gw	Oct dataset
CCG2	-36.2964	-6.57686	gw	Oct dataset
GGSW1	-35.3234	-6.69559	gw	Oct dataset
CCG1	-35.9574	-7.07571	gw	Oct dataset
GGSWG2	-44.7822	-7.90637	gw	Oct dataset
GGSWG4	-32.4306	-6.24842	gw	Oct dataset
GGEG5	-40.0412	-7.54944	gw	Oct dataset
CCWS1	-44.4711	-7.79545	Surface water	Oct dataset
GGES2	-38.6618	-7.04488	Surface water	Oct dataset
GGCS1	-36.9684	-6.8613	Surface water	Oct dataset
CCS4	-37.7148	-6.8294	Surface water	Oct dataset
CCG1A	-32.9512	-6.36949	gw	2017-05-01
CCG1P	-32.6279	-6.3356	gw	2017-05-01
GGSWG1	-34.5634	-6.38101	gw	2017-05-01
GGSWS1	-38.2408	-6.94269	Surface water	2017-05-01
GGES1	-38.775	-6.85919	Surface water	2017-05-01
GGES3	-37.0498	-6.56563	Surface water	2017-05-01

## Sheet: Table 6 VA samples
Soil/sediment samples
Sample	O18	error O18	D2H	error D2H	Sample collected
CCG2 10cm	-4.40815	0.589874	-28.5016	2.88454	2016-05-01
CCG2 110cm	-3.08462	0.628054	-25.9422	3.81277	2016-05-01
CCG2 30-40	-5.51219	0.617374	-34.809	3.03611	2016-05-01
CCG2 50cm	-5.15662	0.575654	-33.8717	2.98731	2016-05-01
CCG2 80cm	-5.04291	0.578349	-34.0508	2.98295	2016-05-01
CCG2 90cm	-6.20907	0.684635	-37.6568	3.20834	2016-05-01
CCG3 110cm	-4.14041	0.475158	-26.7319	2.36568	2016-05-01
CCG3 60cm	-3.77442	0.501658	-26.2634	2.6824	2016-05-01
CCG3 90cm	-5.49655	0.613409	-33.2189	2.90671	2016-05-01
GGEG1 10-30	-7.05271	0.614993	-45.5346	1.53212	2016-05-01
GGEG1 40-45	-6.67554	0.589078	-43.8866	1.41637	2016-05-01
GGEG1 50-60	-7.2196	0.590959	-45.9189	1.41973	2016-05-01
GGEG2 _4 50cm	-5.54928	0.615447	-35.0773	2.97928	2016-05-01
GGEG2 40-50	-6.38062	0.577022	-39.6302	1.33341	2016-05-01
GGEG2 80cm	-6.52029	0.560871	-39.6962	1.27551	2016-05-01
GGEG2 100cm	-5.98414	0.653323	-38.4922	3.22274	2016-05-01
GGEG2 110	-6.44124	0.570483	-40.4497	1.35526	2016-05-01
GGEG2 140cm	-5.6958	0.527171	-37.4854	1.36422	2016-05-01
GGEG3 110cm	-6.12542	0.694896	-39.6914	3.76448	2016-05-01
GGEG3 30-40cm	-4.58126	0.452114	-29.1016	1.22914	2016-05-01
GGEG3 60cm	-6.04195	0.658104	-38.7839	3.27456	2016-05-01
GGEG3 70cm	-4.65955	0.511945	-39.2125	3.3146	2016-05-01
GGEG3 90cm	-6.26592	0.666176	-41.1506	3.70109	2016-05-01
GGEG4 0-10cm	-5.14291	0.644715	-33.1485	2.87142	2016-05-01
GGEG4 20-25cm	-6.14496	0.677531	-38.8776	3.28643	2016-05-01
GGEG4 50cm	-6.93687	0.754477	-42.4625	3.58115	2016-05-01
GGEG4 90cm	-7.08685	0.742506	-43.027	3.61681	2016-05-01
GGEG4 110cm	-5.94461	0.663442	-39.1218	3.43877	2016-05-01
GGSWG4 35-50	-5.53808	0.402883	-28.4815	1.0899	October dataset
GGSWG4 50-65	-6.02618	0.530288	-32.0591	1.65819	October dataset
GGSWG4 65-72	-5.93648	0.435844	-31.7208	1.24889	October dataset
CCG2 20-30	-6.52369	0.46327	-32.6644	1.16449	October dataset
CCG2 30-50	-6.13221	0.425564	-32.0387	1.2591	October dataset
CCG2 50-70	-6.45384	0.548715	-32.9379	1.79254	October dataset
CCG2 70-80	-5.62818	0.430448	-29.6823	1.23507	October dataset
CCG3 0-20	-6.71649	0.473351	-33.8626	1.18467	October dataset
CCG3 45-85	-6.83833	0.549501	-34.2517	2.0435	October dataset
CCG3 80-100	-6.52534	0.606174	-33.012	2.91118	October dataset
CCG3 90-115	-6.85775	0.495629	-35.1469	1.38837	October dataset
CCG3 115-123	-6.18919	0.448168	-32.3395	1.27829	October dataset
GGSWG2 0-10	-1.78018	0.0792085	-5.30988	0.148853	2017-05-01
GGSWG2 10-20	-3.26537	0.145291	1.72743	-0.0484254	2017-05-01
GGSWG2 20-30	-6.39612	0.284593	-32.5852	0.913468	2017-05-01
GGSWG2 30-40	-5.29876	0.235767	-24.7016	0.692466	2017-05-01
GGSWG2 40-55	-0.534495	0.0237821	4.33806	-0.12161	2017-05-01
GGSWG2 55-65	-0.840654	0.0374046	3.66967	-0.102873	2017-05-01
GGSWG2 65-75	-0.600301	0.0267102	4.98488	-0.139742	2017-05-01
Sample	O18	error O18	D2H	error D2H	Sample collected
GGSWG2 75-90	-4.35523	0.193784	-16.0783	0.450727	2017-05-01
GGSWG1 0-20	-6.31411	0.280944	-29.3321	0.822274	2017-05-01
GGSWG1 20-40	-5.70582	0.253878	-25.5188	0.715375	2017-05-01
GGSWG1 40-60	-5.17862	0.230421	-24.4144	0.684415	2017-05-01
GGSWG1 60-70	-5.20322	0.231515	-23.9209	0.670581	2017-05-01
GGSWG1 70-80	-5.34748	0.237934	-24.2343	0.679368	2017-05-01
GGSWG1 80-94	-5.61466	0.249822	-25.3686	0.711165	2017-05-01
CCG3 0-15	-9.36493	0.416689	-52.2506	1.46476	2017-05-01
CCG3 15-30	-7.48292	0.33295	-36.9122	1.03477	2017-05-01
CCG3 30-50	-6.22537	0.276996	-27.6118	0.774048	2017-05-01
CCG3 50-70	-5.99328	0.266669	-24.9746	0.70012	2017-05-01
CCG3 70-85	-6.40794	0.285119	-27.1459	0.760989	2017-05-01
CCG3 85-100	-5.74266	0.255518	-24.4151	0.684434	2017-05-01
CCG3 85-113	-6.25691	0.278399	-26.0955	0.731543	2017-05-01
CCG1 80-90	-6.34375	0.282263	-28.6608	0.803455	2017-05-01
CCG1 70-80	-6.63975	0.295433	-27.4342	0.769069	2017-05-01
CCG1 60-70	-6.64711	0.295761	-29.5461	0.828273	2017-05-01
CCG1 0-20	-6.6048	0.293878	-29.5372	0.828024	2017-05-01
CCG1 20-45	-6.75233	0.300443	-30.1348	0.844777	2017-05-01
CCG1 45-60	-6.74352	0.300051	-30.1178	0.8443	2017-05-01
